# Supplementary material for: Ag/AgCl@MIL-88A(Fe) heterojunction ternary composites: towards the photocatalytic degradation of organic pollutants
Source: Royal Society of Chemistry journal article supplement (doi:10.1039/d0dt03147j), 2021-01-01
Supplement: d0dt03147j1.pdf [file d0dt03147j1.pdf]

## Electronic Supplementary Information

# **Ag/AgCl@MIL-88A(Fe) Heterojunction Ternary Composite: Towards the Photocatalytic Degradation of Organic Pollutants**

Vandana P. V,<sup>a</sup> Divya K. S,<sup>a</sup> Deepak P. Dubal,<sup>c</sup> Nayarassery N. Adarsh,<sup>\*a</sup> and Suresh Mathew<sup>\*a,b</sup>

<sup>a</sup>School of Chemical Sciences, Mahatma Gandhi University, Kottayam, 686560, Kerala, India.

<sup>b</sup>Advanced Molecular Materials Research Centre (AMMRC), Mahatma Gandhi University, Kottayam, 686560, Kerala, India.

### Table of Contents

|                                                                                 |    |
|---------------------------------------------------------------------------------|----|
| 1. FESEM image of MAG-2 (Figure S1) .....                                       | S2 |
| 2. Photocatalytic degradation curve of RhB via <i>in situ</i> (Figure S2) ..... | S2 |
| 3. Photocatalytic degradation curve of MB via <i>in situ</i> (Figure S3) .....  | S3 |
| 4. Photocatalytic degradation curve of PNP via <i>ex-situ</i> (Figure S4) ..... | S3 |
| 5. Photocatalytic degradation curve of RhB via <i>ex-situ</i> (Figure S5) ..... | S4 |
| 6. Photocatalytic degradation curve of MB via <i>ex-situ</i> (Figure S6) .....  | S4 |
| 7. Mass spectrum (Figure S7).....                                               | S5 |
| 8. FT-IR comparison plot (Figure S8) .....                                      | S5 |
| 9. PXRD comparison plot (Table S9) .....                                        | S6 |

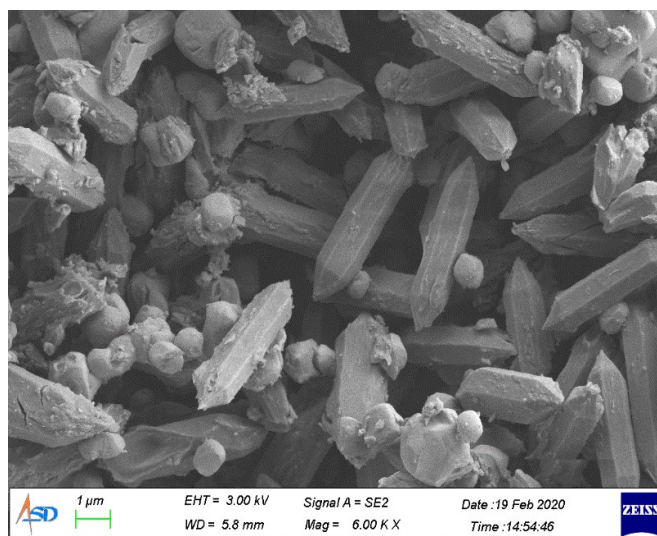

Figure S1. FESEM image of MAG-2.

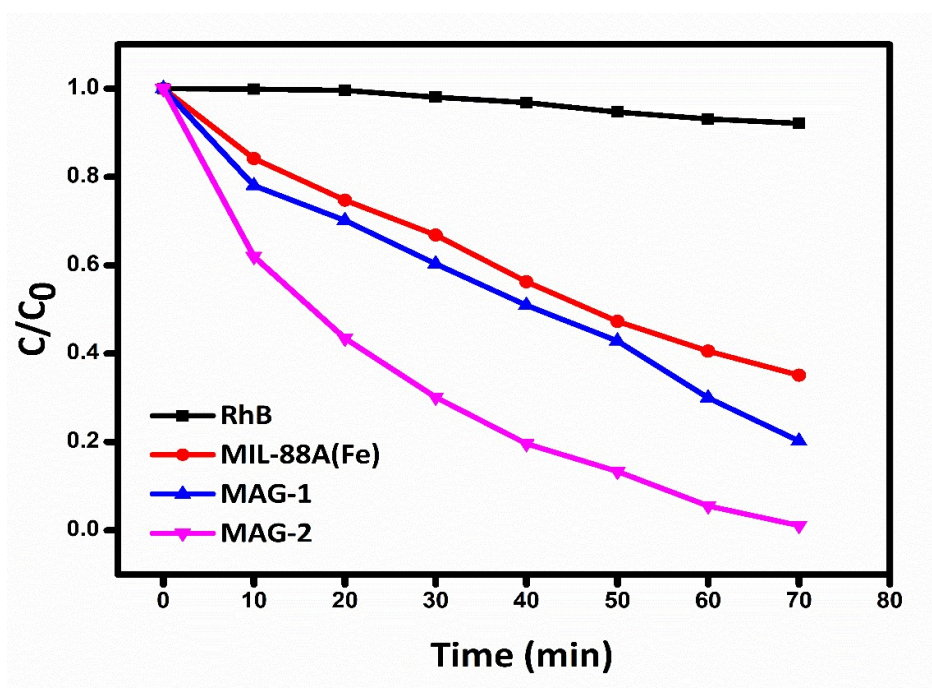

Figure S2. Photocatalytic degradation curves of RhB using MIL-88A(Fe), MAG-1, MAG-2.

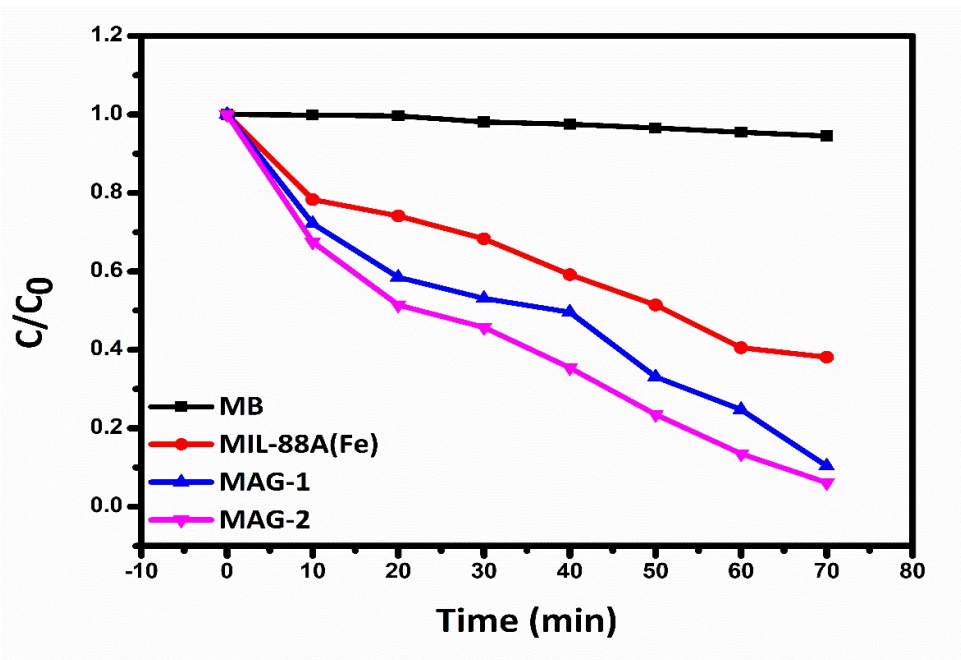

Figure S3. Photocatalytic degradation curves of MB using MIL-88A(Fe), MAG-1, MAG-2.

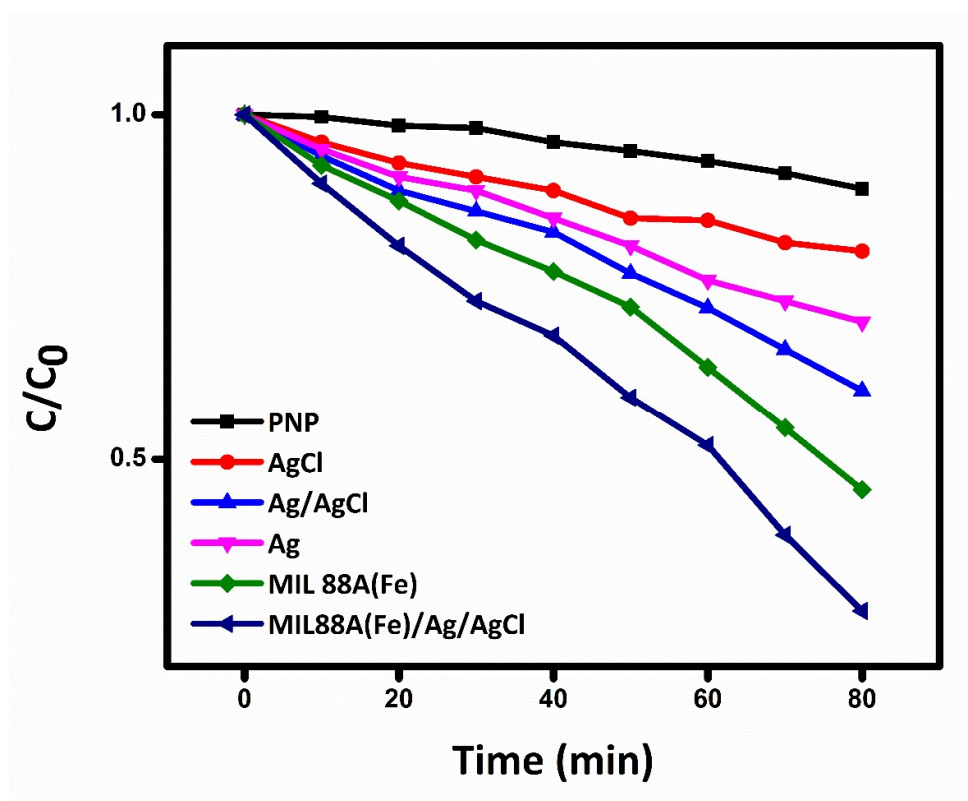

Figure S4. Photocatalytic degradation curves of PNP using Ag/AgCl, MIL-88A(Fe) and MIL-88A(Fe)/Ag/AgCl (*ex-situ*).

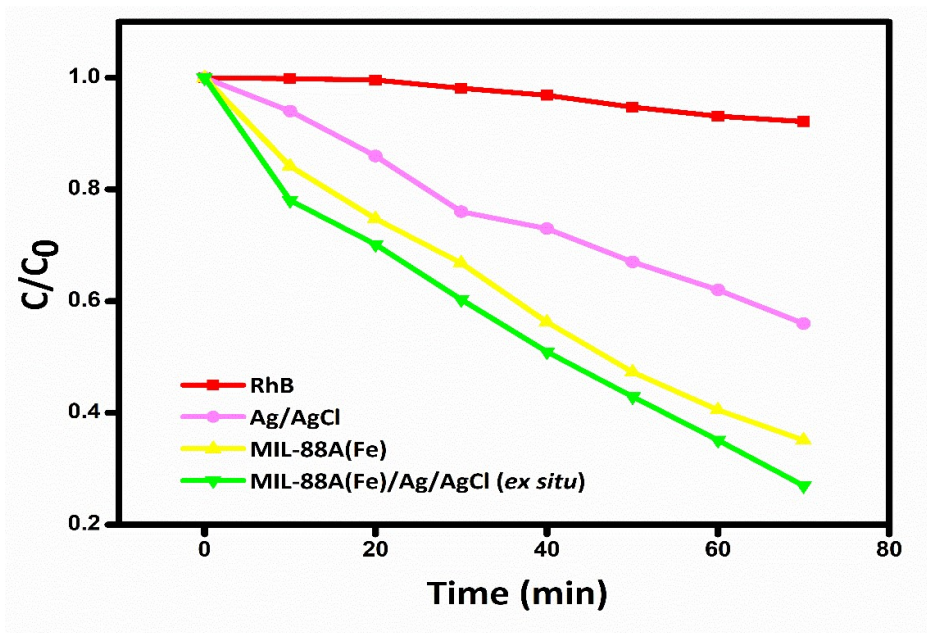

**Figure S5.** Photocatalytic degradation curves of RhB using Ag/AgCl, MIL-88A(Fe) and MIL-88A(Fe)/Ag/AgCl (*ex-situ*).

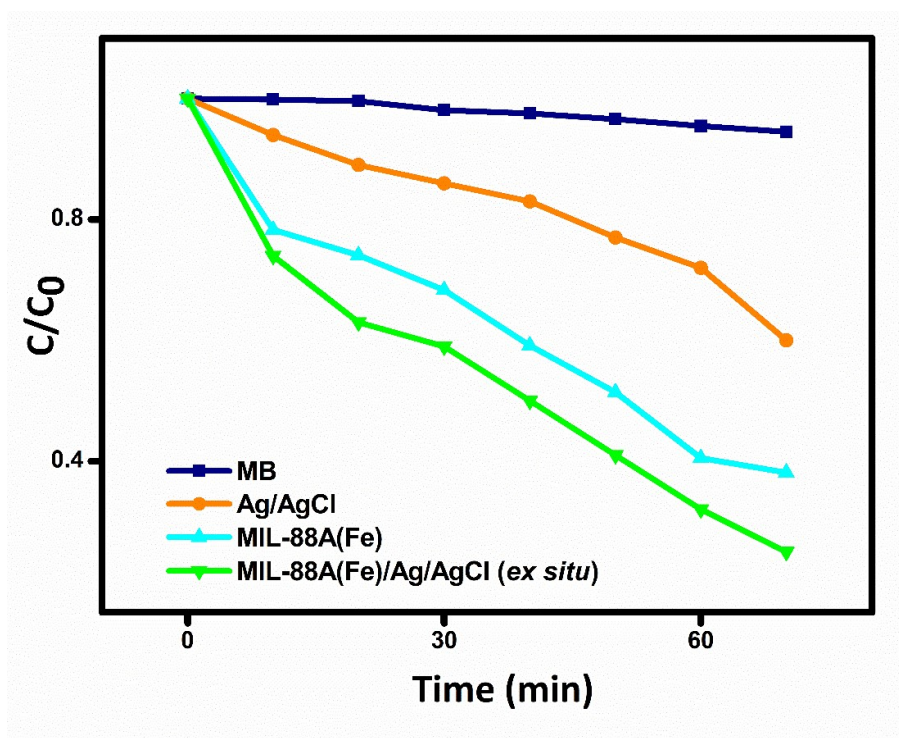

**Figure S6.** Photocatalytic degradation curves of MB using Ag/AgCl, MIL-88A(Fe) and MIL-88A(Fe)/Ag/AgCl (*ex-situ*).



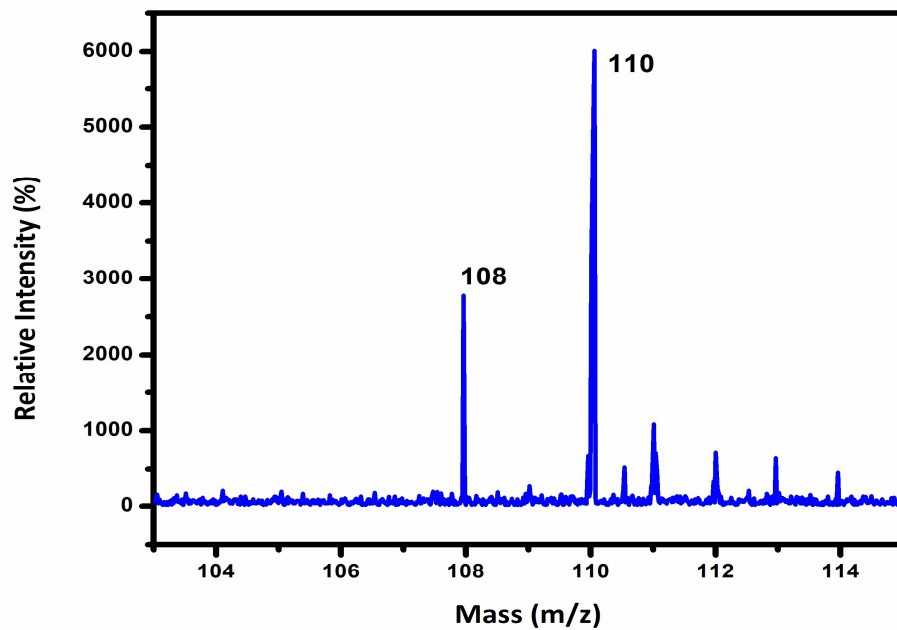

Figure S7. Mass spectrum of Para-nitrophenol after degradation.

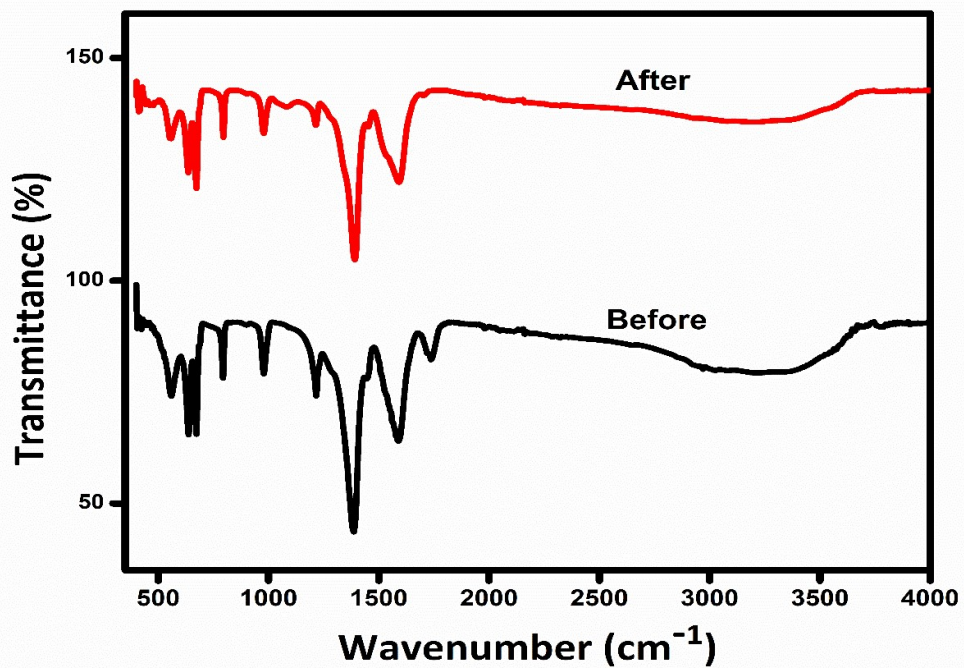

Figure S8. The FT-IR spectra comparison plot of MAG-2 before and after photocatalysis.

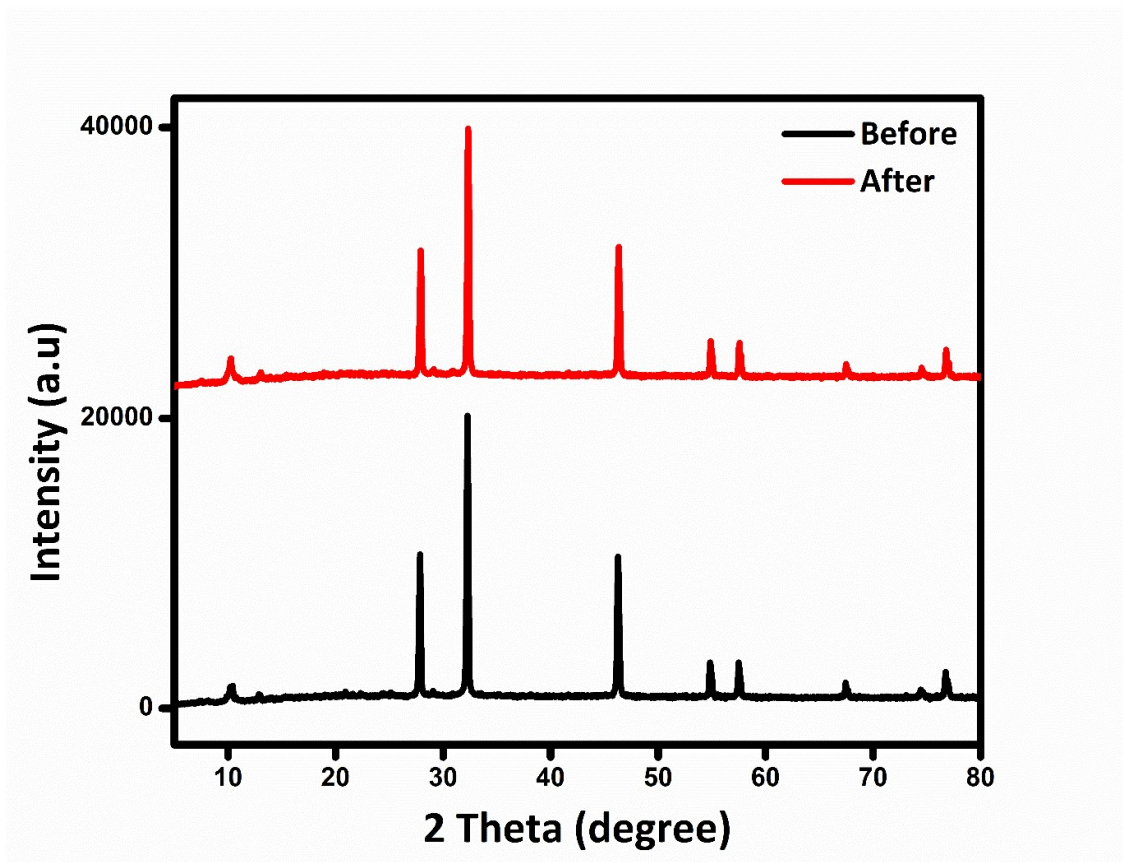

Figure S9. The PXR D patterns of MAG-2 before and after photocatalysis.
